# Supplementary material
Source: PubMed Central journal article supplement (PMC5927800)
Supplement: NIHMS952136-supplement-supplementary-1.pdf [file NIHMS952136-supplement-supplementary-1.pdf]

**Supplementary table 1. The source of evidence for each transcript of PCV-1. The headings indicate the method by which the evidence was obtained.**

| Transcript | PacBio Non-amplified | PacBio Random hexamer | PacBio OligodT | Illumina Random hexamer | Illumina OligodT | Gel electrophoresis |
|------------|----------------------|-----------------------|----------------|-------------------------|------------------|---------------------|
| Cap        | ✓                    | ✓                     | ✓              | ✓                       | ✓                | ✓                   |
| Cap3S      | ✓                    | ✓                     | ✓              |                         |                  |                     |
| Cap-nsp    |                      | ✓                     | ✓              |                         |                  | ✓                   |
| Rep        | ✓                    | ✓                     | ✓              |                         | ✓                |                     |
| Rep3L      | ✓                    |                       | ✓              |                         | ✓                |                     |
| Rep'       |                      |                       |                | ✓                       | ✓                |                     |
| Rep'5L1    | ✓                    | ✓                     | ✓              |                         |                  | ✓                   |
| Rep"5L1    | ✓                    |                       | ✓              |                         | ✓                | ✓                   |
| Rep'5L2    |                      | ✓                     | ✓              |                         | ✓                |                     |
| Rep3a      |                      |                       |                | ✓                       |                  |                     |
| Rep3b      |                      |                       |                | ✓                       |                  |                     |
| Rep3c1     |                      |                       |                | ✓                       |                  |                     |
| Rep3c2     |                      |                       | ✓              | ✓                       |                  |                     |
| Rep3c3     |                      |                       |                | ✓                       |                  |                     |
| Rep3c4     |                      |                       |                | ✓                       |                  |                     |
| Atr        |                      |                       | ✓              | ✓                       |                  | ✓                   |
| Ctr        | ✓                    | ✓                     | ✓              |                         |                  |                     |
| Ctr'       | ✓                    |                       |                | ✓                       |                  | ✓                   |
