# Supplementary material
Source: PubMed Central journal article supplement (PMC5927800)
Supplement: NIHMS952136-supplement-supplementary-2.pdf [file NIHMS952136-supplement-supplementary-2.pdf]

Supplementary table 2. The list of the response elements in the promoter regions of PCV-1 genes.

| <b>Response element</b> | <b>Promoter region</b> | <b>Location</b> | <b>Sequence</b> |
|-------------------------|------------------------|-----------------|-----------------|
| <b>AP3</b>              | rep                    | 1629-1640       | GGGTGTGCCAAA    |
| <b>SP1</b>              | rep                    | 1680-1685       | GGGCGG          |
| <b>USF/MLTF</b>         | rep                    | 1713-1725       | GGCCACGTCATC    |
| <b>ISRE</b>             | rep                    | 1727-1741       | ATAAAAGTGAAAGA  |
| <b>AP4</b>              | rep                    | 1747-1756       | CTGCTGCAG       |
| <b>AP2</b>              | cap                    | 480-485         | GCCCGC          |
| <b>SP1</b>              | cap                    | 560-565         | GGGCGG          |
| <b>AP3</b>              | cap                    | 566-577         | CTTCCCACAACC    |
