# Supplementary material
Source: PubMed Central journal article supplement (PMC5927800)
Supplement: NIHMS952136-supplement-supplementary-3.pdf [file NIHMS952136-supplement-supplementary-3.pdf]

**Supplementary table 3. Splicing variants. The numbers in the second column represent the first and last nucleotide of the intron. New introns are marked with the symbol \*.**

| <b>Transcript</b> | <b>Intron</b>                |
|-------------------|------------------------------|
| Cap               | 1,725-347                    |
| Cap3S             | 1,725-347                    |
| Cap-nsp           | -                            |
| Rep               | -                            |
| Rep3L             | -                            |
| Rep'              | 404-786                      |
| Rep'5L1           | 404-786                      |
| Rep"5L1           | 404-786, *1253-1569          |
| Rep'5L2           | 404-786                      |
| Rep3a             | 85-786                       |
| Rep3b             | 85-801                       |
| Rep3c1            | 85-238, 404-786              |
| Rep3c2            | 85-241, 404-786              |
| Rep3c3            | 85-253, 404-786              |
| Rep3c4            | 85-259, 404-786              |
| Atr               | -                            |
| Ctr               | -                            |
| Ctr'              | 404-786, *917-1,569, 404-786 |
